# Supplementary material for: Environment or genetic isolation? An atypical intestinal microbiota in the Maltese honey bee Apis mellifera spp. ruttneri
Source: PubMed Central journal article supplement (PMC9995969; doi:10.3389/fmicb.2023.1127717), 2023-02-23
Supplement: Data_Sheet_1.pdf [file Data_Sheet_1.pdf]

## *Supplementary Material*

**Environment or genetic isolation? An atypical intestinal microbiota in the Maltese honey bee**  
*Apis mellifera* subsp. *ruttneri*

**Author: Francesca Gaggia<sup>1†</sup>, Rasmus Riemer Jakobsen<sup>2†</sup>, Daniele Alberoni<sup>1\*</sup>, Loredana Baffoni<sup>1</sup>, Simone Cutajar<sup>3</sup>, David Mifsud<sup>3</sup>, Dennis Sandris Nielsen<sup>2</sup>, Diana Di Gioia<sup>1</sup>**

<sup>1</sup> Department of Agricultural and Food Sciences, University of Bologna, Viale Fanin 44, Bologna, 40127, Italy.

<sup>2</sup>Section of Microbiology and Fermentation, Department of Food Science, Faculty of Science, University of Copenhagen, DK-1958 Copenhagen, Denmark

<sup>3</sup>Institute of Earth Systems, L-Università ta' Malta, University, Ring Rd, Msida, MSD2080, Malta.

**\* Correspondence:**

Corresponding Author: [daniele.alberoni@unibo.it](mailto:daniele.alberoni@unibo.it)

†These authors contributed equally to this work and share first authorship

## 1 Supplementary Figures and Tables

### 1.1 Supplementary Figures

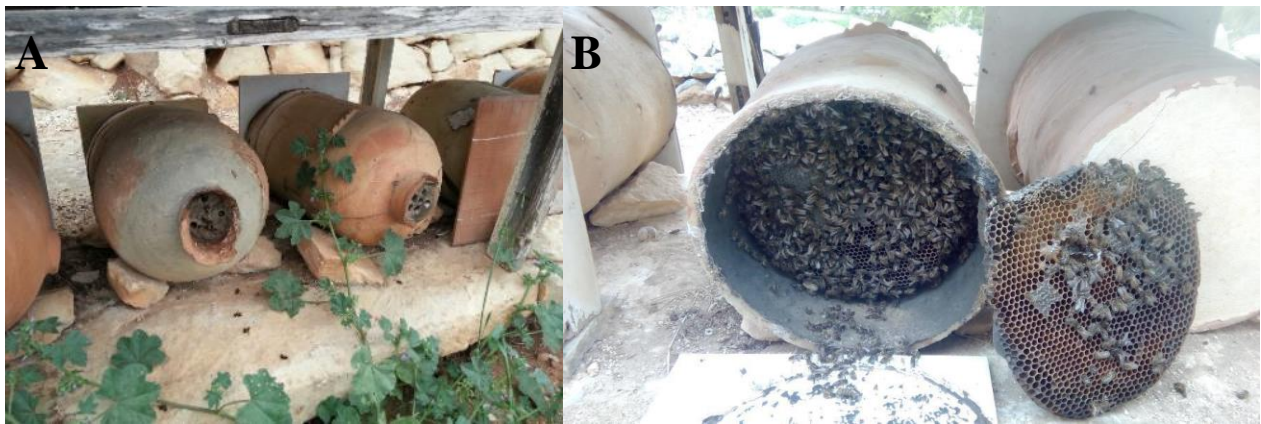

**Supplementary Figure 1A-1B.** Up until the 1950's, terracotta hives populated with *Apis mellifera ruttneri* were typical of the Maltese Island. This apiary belongs to Mario Sant, a beekeeper promoting Maltese honey bee conservation.

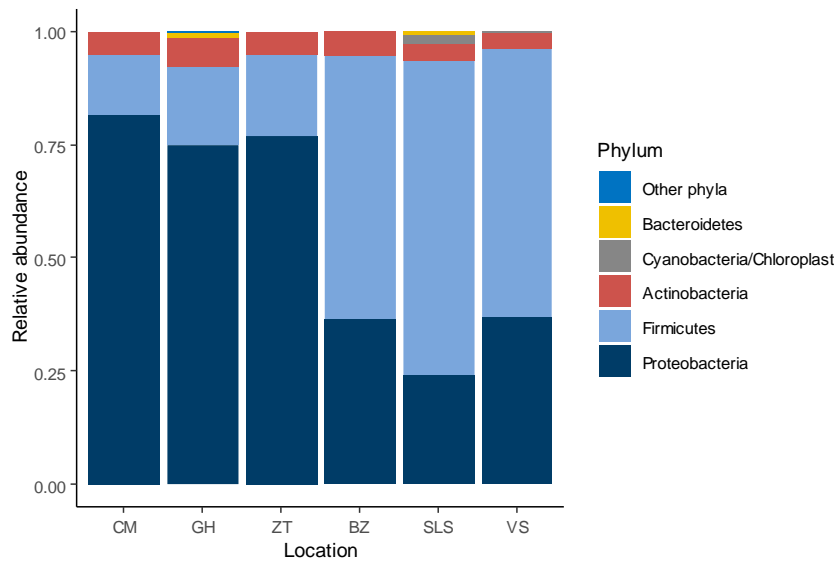

**Supplementary Figure 2.** Bar chart showing the relative abundance of bacterial phyla in the sampling sites in Malta and Italy: [CM] University of Malta – Campus Msida, [GH] Ghargħur, [ZT] Żeitun, [BZ] Bozen, [SLS] San Lazzaro di Savena, [VS] Valsamoggia.

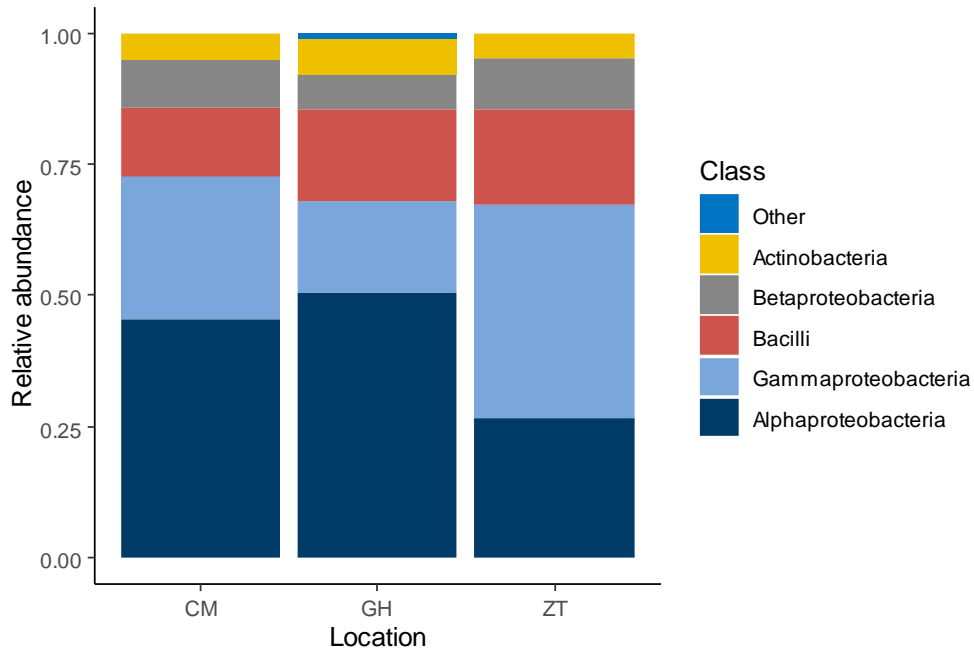

**Supplementary Figure 3.** Bar chart showing the relative abundance of bacterial classes in the sampling sites in Malta and Italy: [CM] University of Malta – Campus Msida, [GH] Għargħur, [ZT] Żeitun, [BZ] Bozen, [SLS] San Lazzaro di Savena, [VS] Valsamoggia.

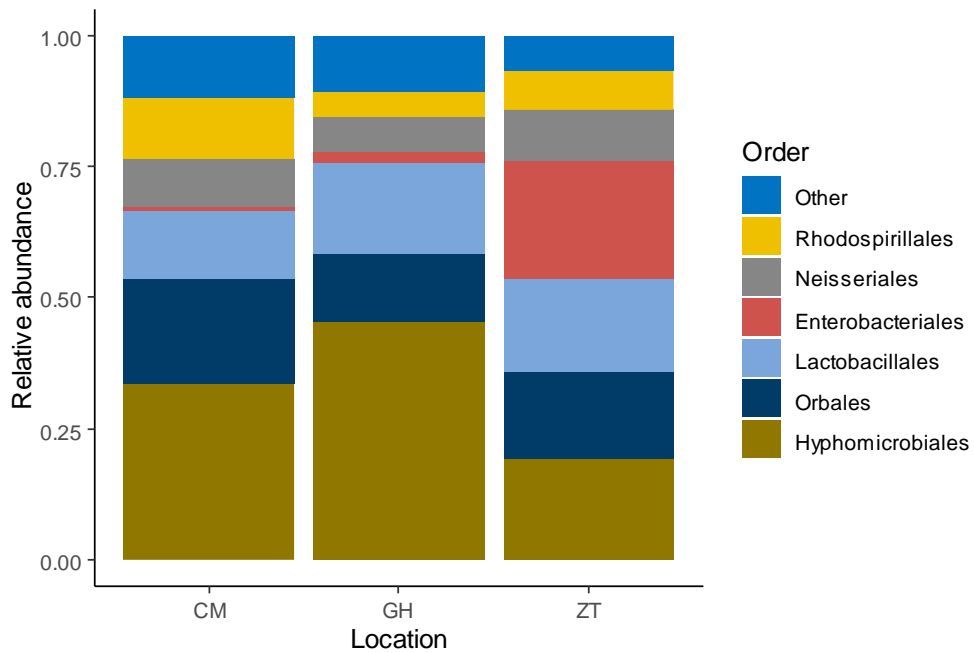

**Supplementary Figure 4.** Bar chart showing the relative abundance of bacterial orders in the sampling sites in Malta and Italy: [CM] University of Malta – Campus Msida, [GH] Għargħur, [ZT] Żeitun, [BZ] Bozen, [SLS] San Lazzaro di Savena, [VS] Valsamoggia.

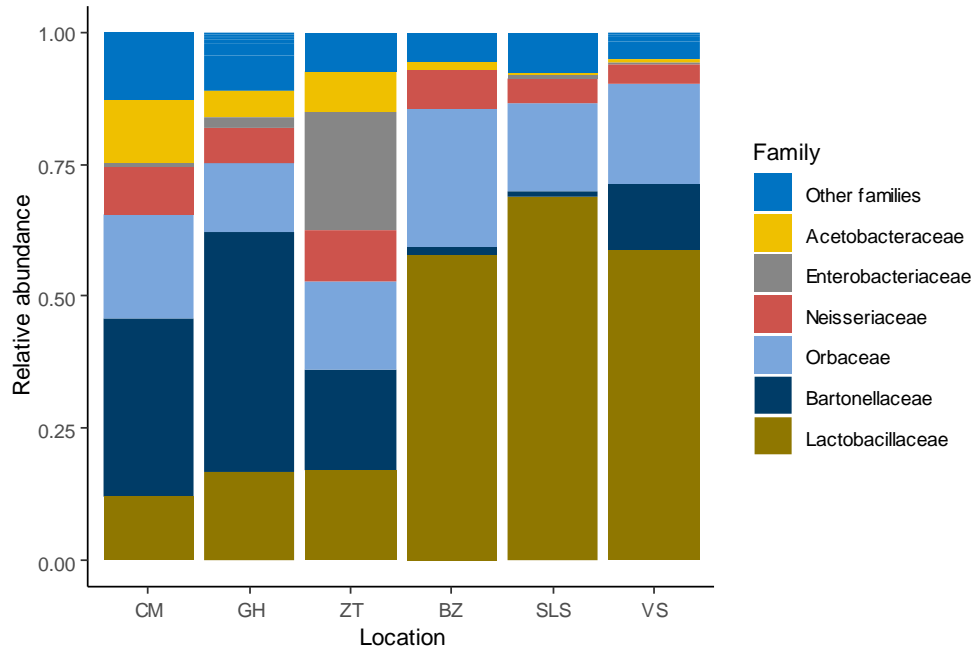

**Supplementary Figure 5.** Bar chart showing the relative abundance of bacterial orders in the sampling sites in Malta and Italy: [CM] University of Malta – Campus Msida, [GH] Għargħur, [ZT] Żejtun, [BZ] Bozen, [SLS] San Lazzaro di Savena, [VS] Valsamoggia.

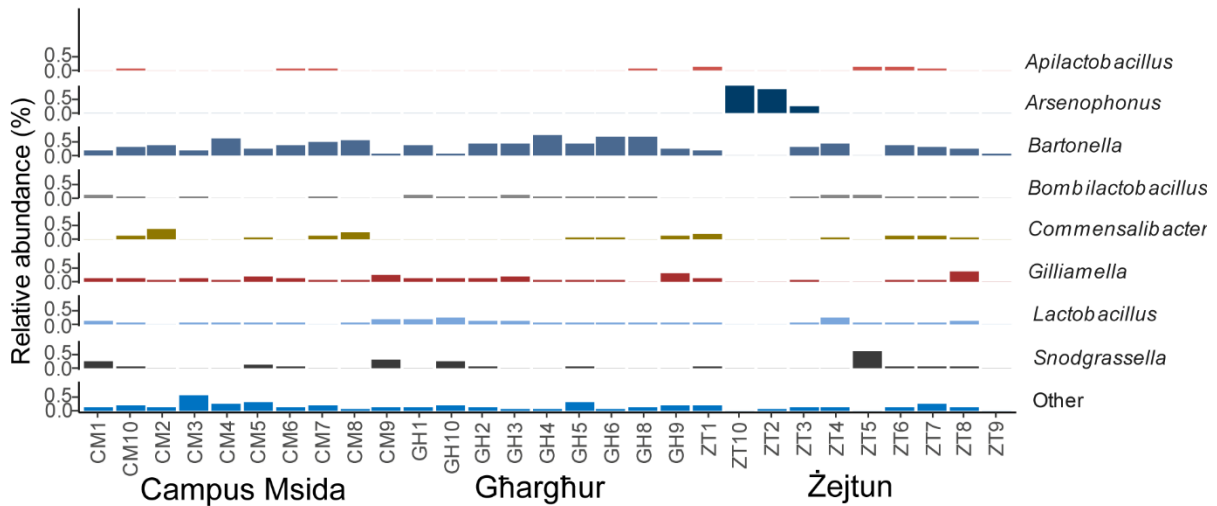

**Supplementary Figure 6.** Bar chart showing the relative abundance of the major genera of bacteria in every sampled honey bee gut in Malta.

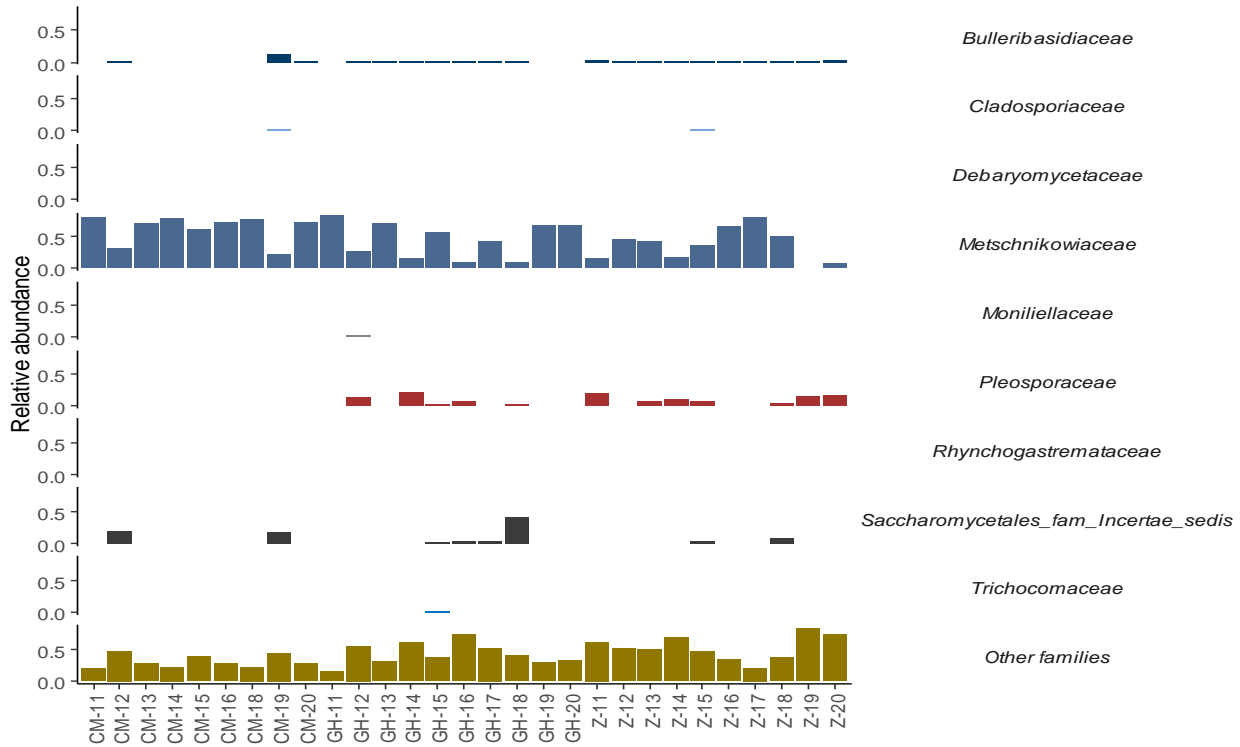

**Supplementary Figure 7.** Bar chart showing the relative abundance of the major families of fungi in every sampled honey bee gut in Malta.

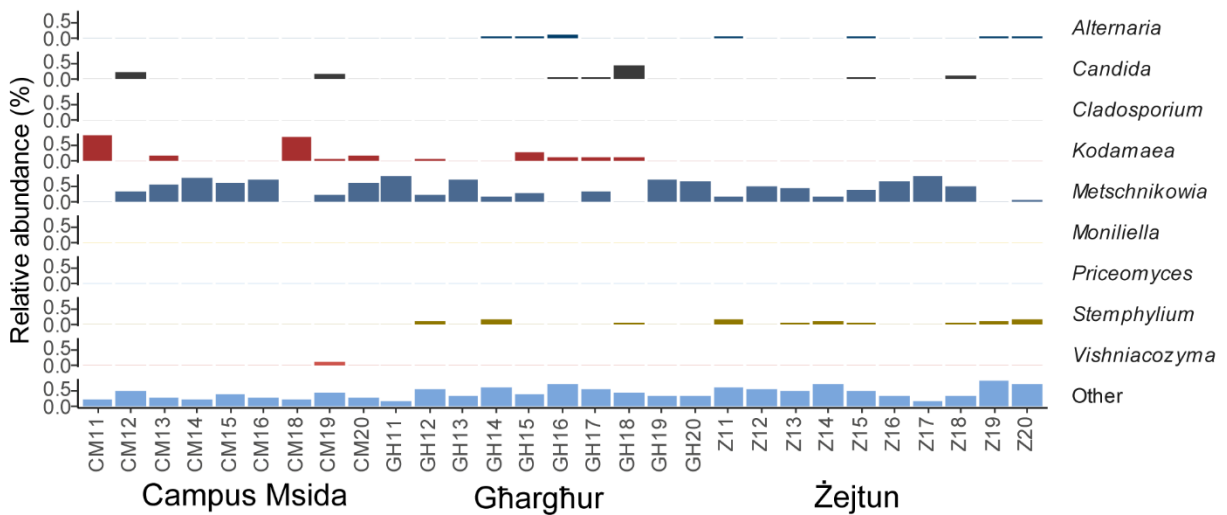

**Supplementary Figure 8.** Bar chart showing the relative abundance of the major genera of fungi in every sampled honey bee gut in Malta.

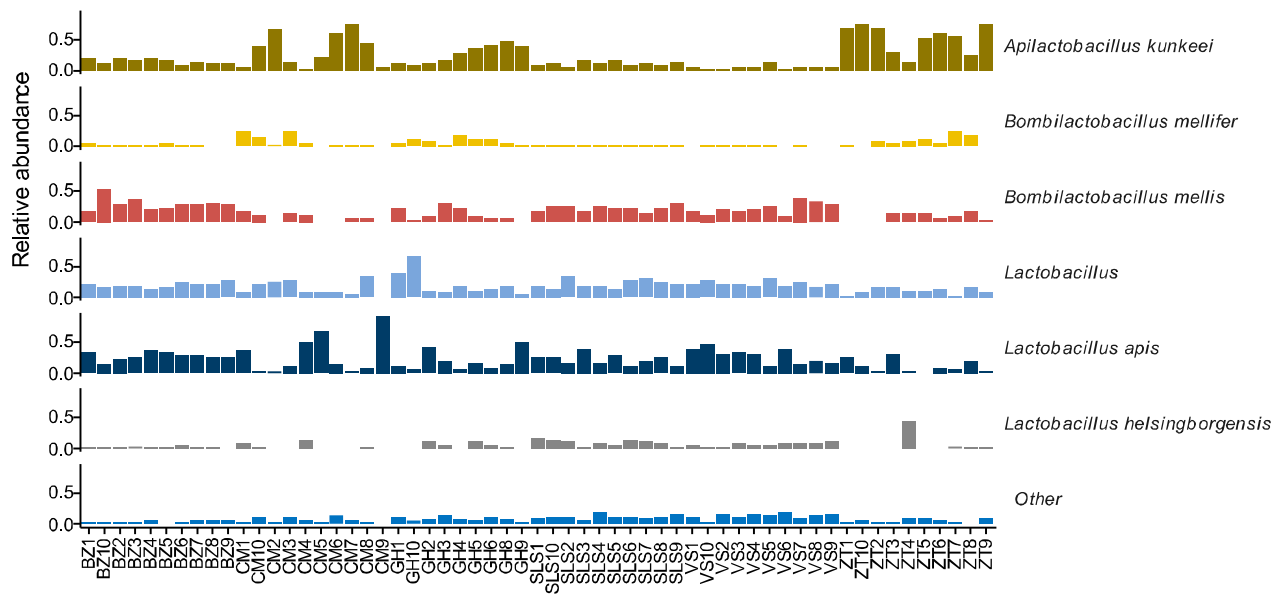

**Supplementary Figure 9.** Bar chart showing the relative abundance of the major species belonging to the family Lactobacillaceae in every sampled honey bee gut in Malta and Italy.

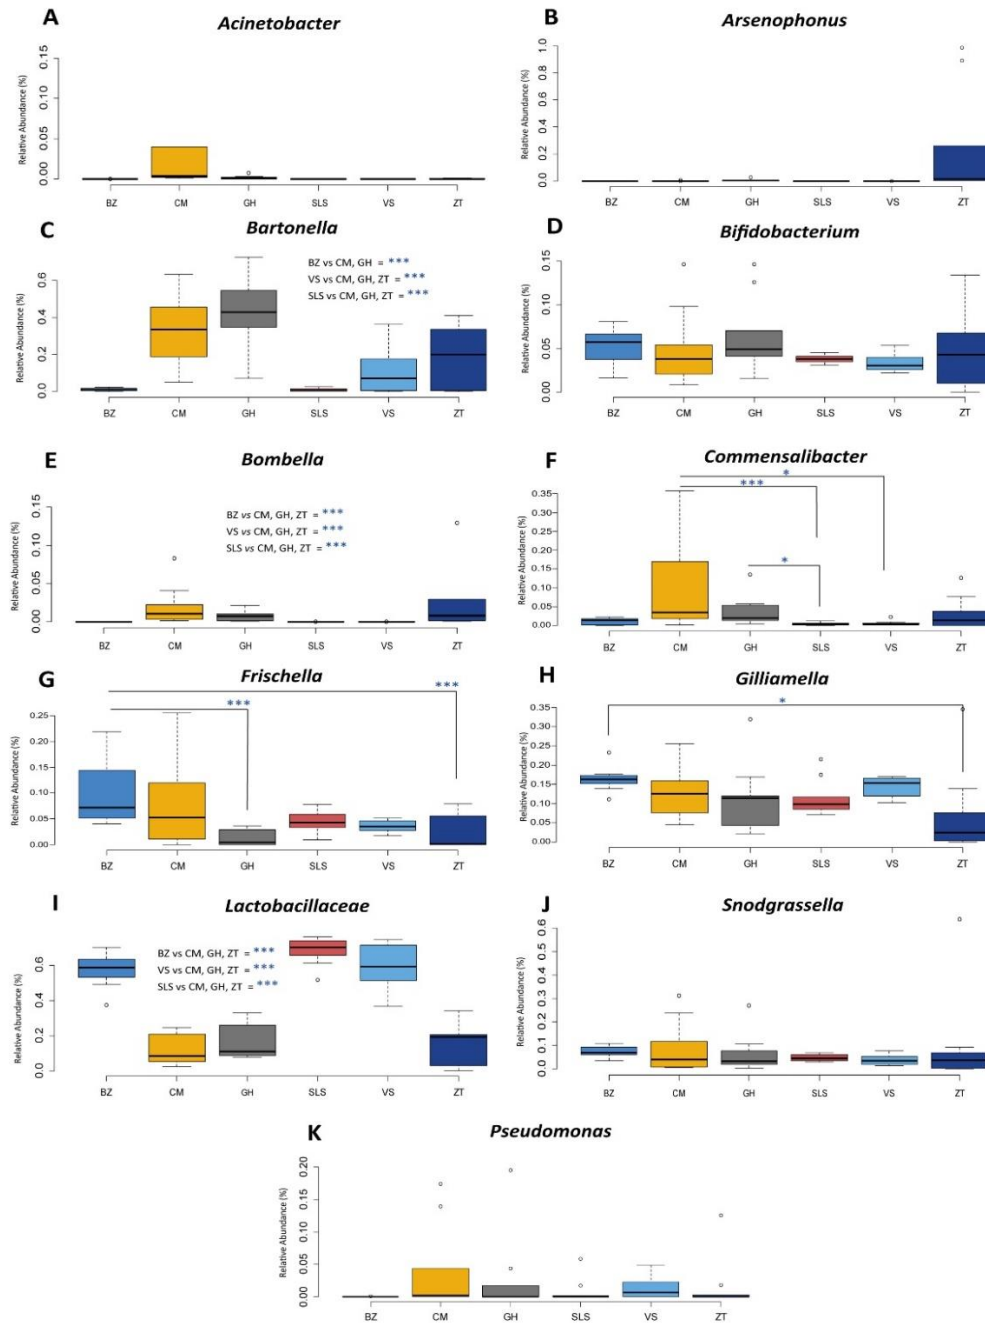

**Supplementary Figure 10A – 10K.** The boxplot charts show the relative abundance of the major microbial taxa populating the sampled honey bee guts: A) *Acinetobacter*; B) *Arsenophonus*; C) *Bartonella*; D) *Bifidobacterium*; E) *Bombella*; F) *Commensalibacter*; G) *Frischella*; H) *Gilliamella*; I) *Lactobacillaceae*; J) *Snodgrassella* and K) *Pseudomonas* in the different sampling sites. The sampling sites for Italy are [BZ] Bozen, South Tyrol region; [SLS] San Lazzaro di Savena, Emilia Romagna region; [VS] Valsamoggia, Emilia Romagna region, all belonging to C lineage. Sampling sites for Malta are [CM] University of Malta – Campus Msida; [GH] Għargħur; [ZT] Żeitun, all belonging to A lineage. Every sampling site account for 10 sampled honey bees. Asterisks indicate statistically significant differences (\*p<0.05; \*\*\*p<0.01).

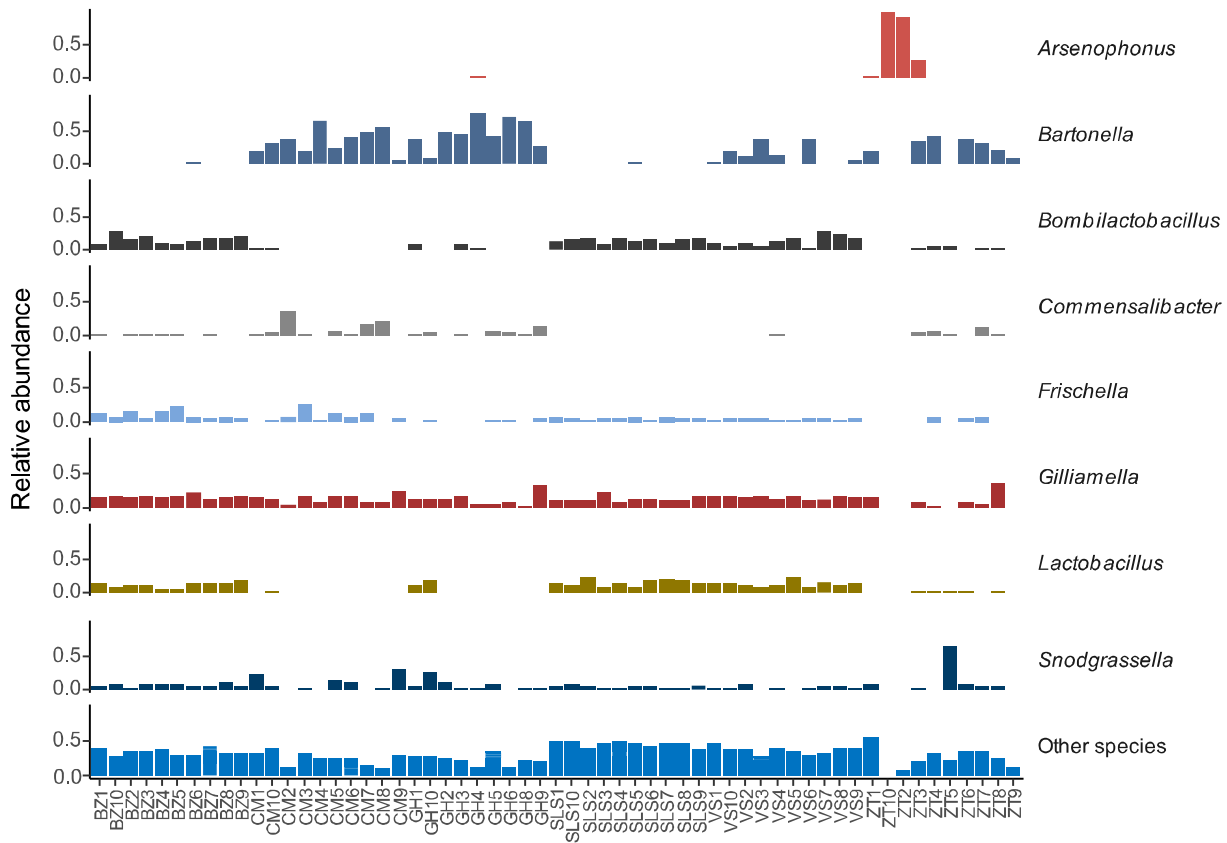

**Supplementary Figure 11.** Bar chart showing the relative abundance (%) of the major bacterial genera in every sampled honey bee gut in Malta and Italy.

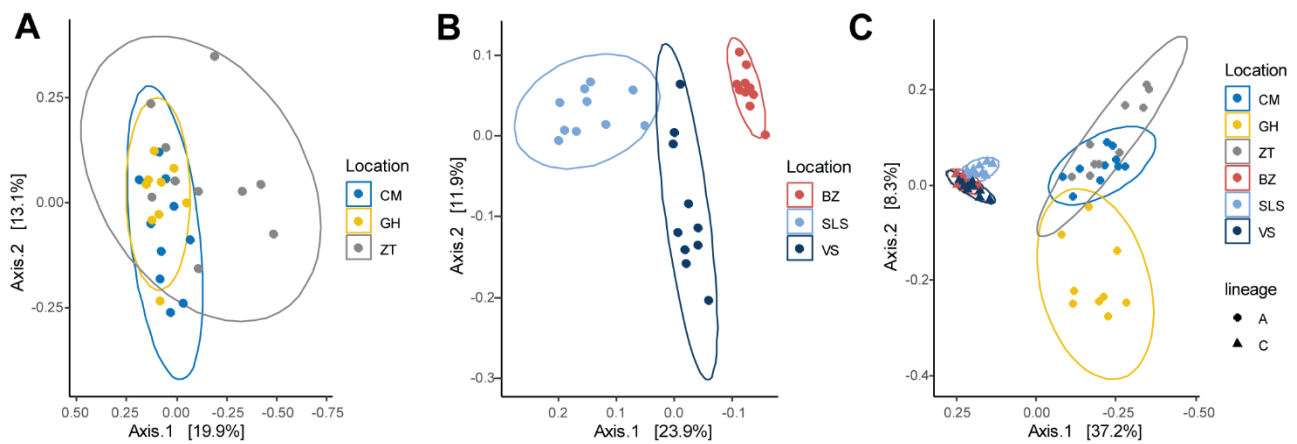

**Supplementary Figure 12.** A)  $\beta$ -diversity Bray–Curtis dissimilarity index per sampling site in Malta; B)  $\beta$ -diversity Bray–Curtis dissimilarity index per sampling site in Italy; C)  $\beta$ -diversity Bray–Curtis dissimilarity index per mitochondrial haplotype (lineage) and sampling site.



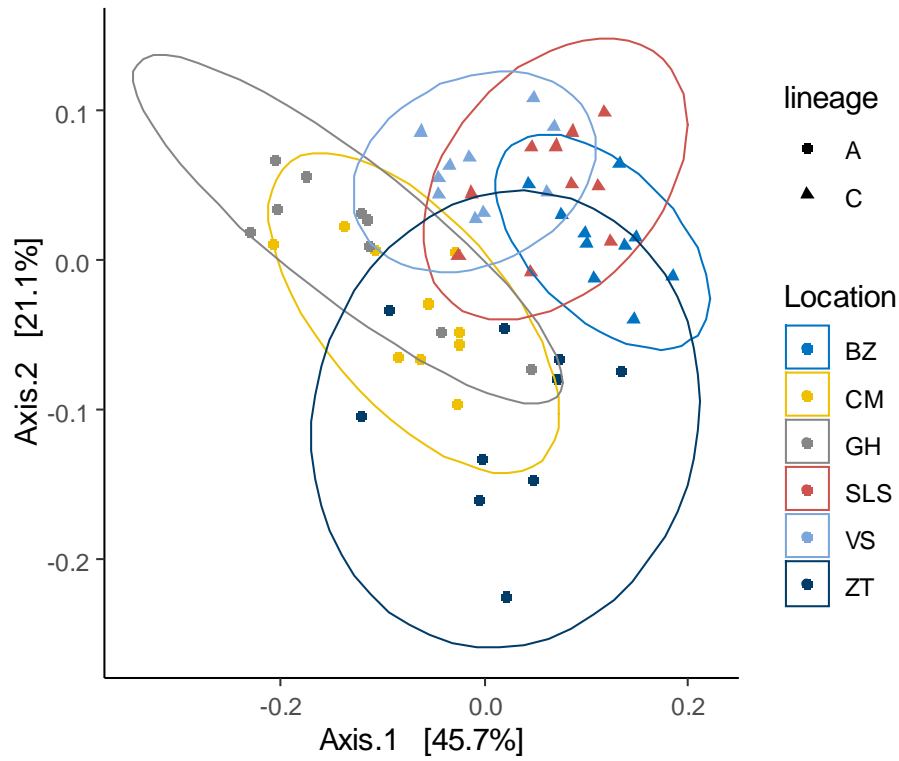

**Supplementary Figure 13.** PCA for PCRUST2 overall prediction of functionality, considering all the honey bees sampled both in Italy and in Malta, separates the lineage C honey bees from those of lineage A.

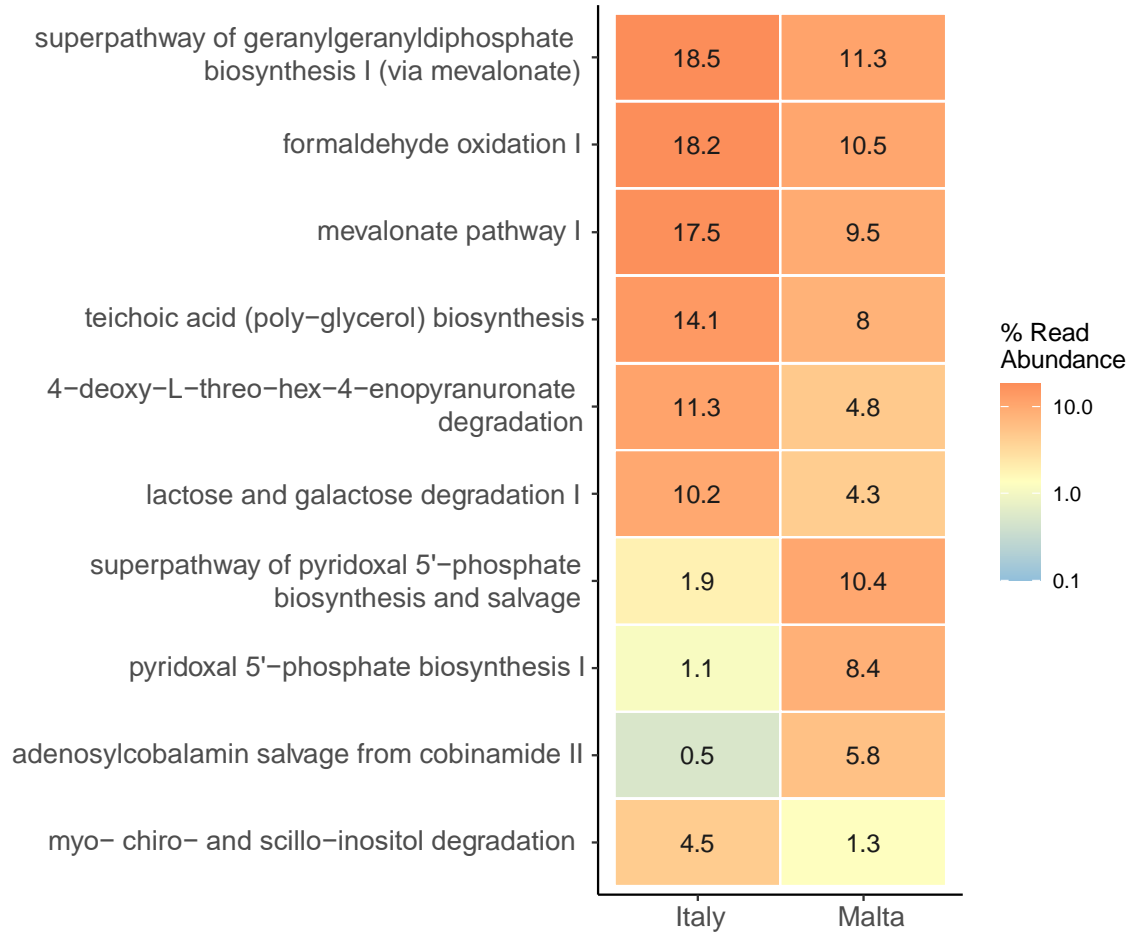

**Supplementary Figure 14.** Differential abundance heatmap highlighting significantly differentially abundant ( $p < 0.05$ ) microbial genera between honey bees sampled in Italy (lineage C) and in Malta (lineage A), showing the relative abundance of the genus;



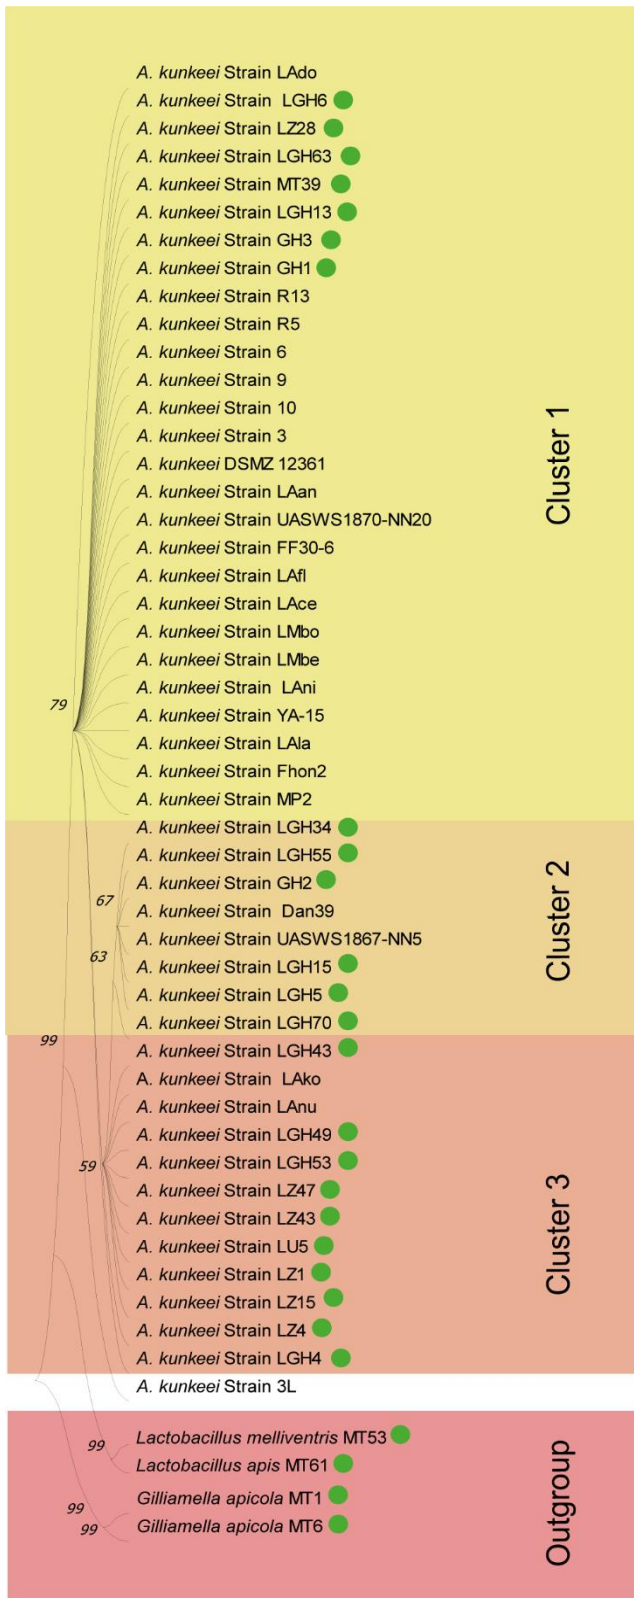

**Supplementary Figure 16.** Phylogenetic tree showing the isolated *A. kunkeei* isolated within this work (Indicated with the green dot) and other *A. kunkeei* strains retrieved from NCBI Genome RefSeq.

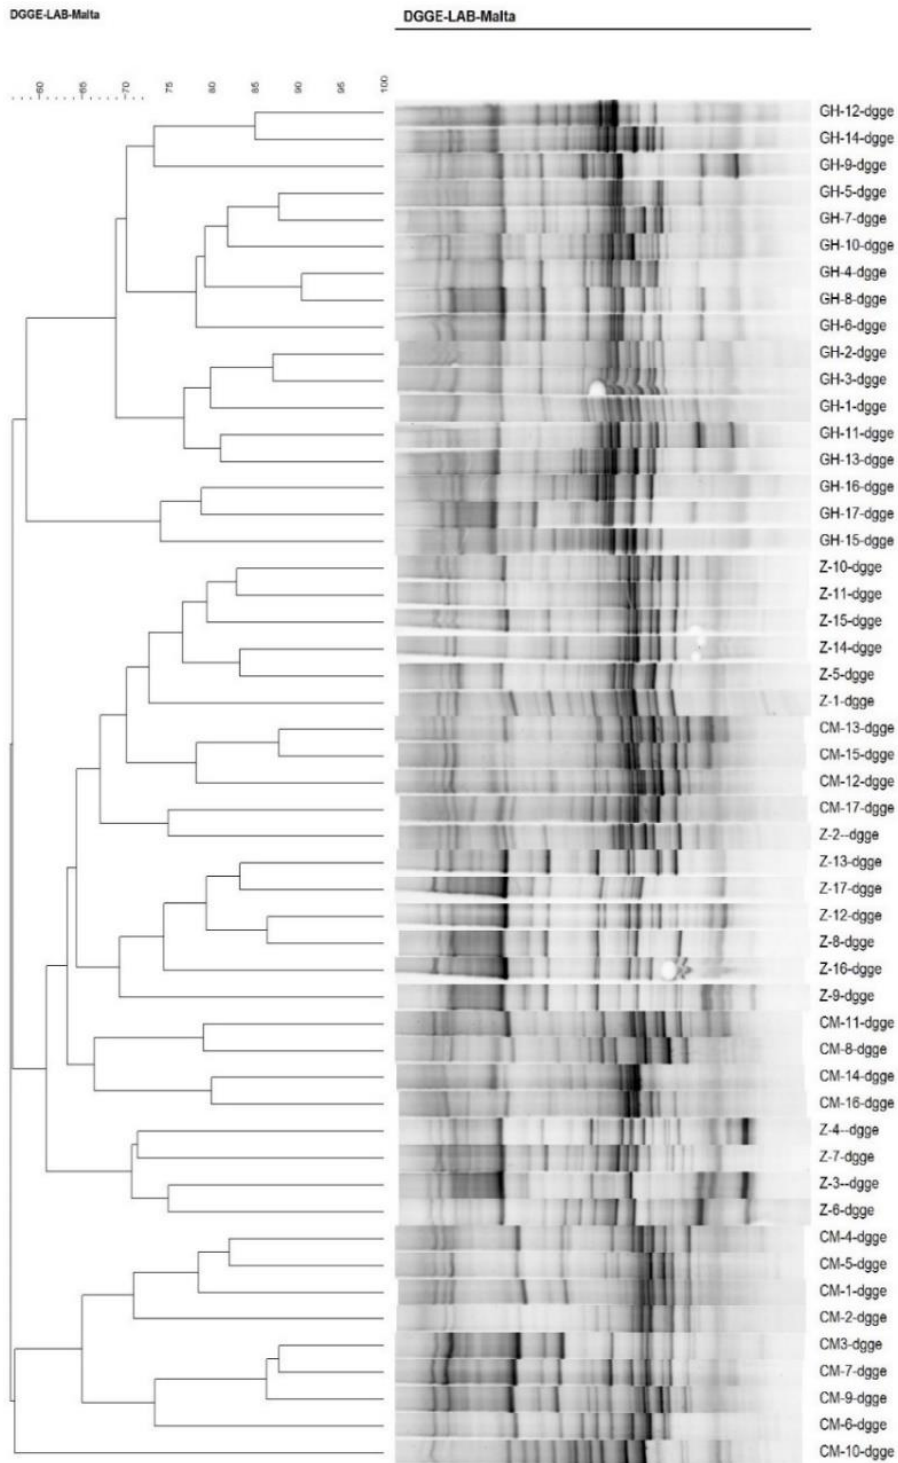

**Supplementary Figure 17.** DGGE profiles on Lactobacillaceae populating the gut of Maltese honey bees.

## 1.2 Supplementary Tables

**Supplementary Table 1.** The table reports the list of samples derived from [Alberoni et al., 2021a](#); [Alberoni et al., 2021b](#); [Baffoni et al., 2021](#) research works, the original samples name and the NCBI accession number and bio-project.

| Samples name in this work                                      | Sample name in the original works | NCBI accession | Reference                                                                                |
|----------------------------------------------------------------|-----------------------------------|----------------|------------------------------------------------------------------------------------------|
| <b>BOLZANO/BOZEN (<i>APIS MELLIFERA CARNICA</i>)</b>           |                                   |                |                                                                                          |
| <b>BZ1</b>                                                     | 0.CTR.1                           | SAMN15728541   | <a href="#">Alberoni et al., 2021a</a><br>(NCBI bioproject <a href="#">PRJNA655184</a> ) |
| <b>BZ2</b>                                                     | 0.CTR.2                           | SAMN15728542   |                                                                                          |
| <b>BZ3</b>                                                     | 0.CTR.3                           | SAMN15728543   |                                                                                          |
| <b>BZ4</b>                                                     | 0.CTR.4                           | SAMN15728544   |                                                                                          |
| <b>BZ5</b>                                                     | 0.CTR.5                           | SAMN15728545   |                                                                                          |
| <b>BZ6</b>                                                     | 0.IMID.1                          | SAMN15728552   |                                                                                          |
| <b>BZ7</b>                                                     | 0.IMID.2                          | SAMN15728553   |                                                                                          |
| <b>BZ8</b>                                                     | 0.IMID.3                          | SAMN15728554   |                                                                                          |
| <b>BZ9</b>                                                     | 0.IMID.4                          | SAMN15728555   |                                                                                          |
| <b>BZ10</b>                                                    | 0.IMID.5                          | SAMN15728556   |                                                                                          |
| <b>VALSAMOGIA (<i>APIS MELLIFERA LIGUSTICA</i>)</b>            |                                   |                |                                                                                          |
| <b>VS1</b>                                                     | T0.C1                             | SAMN16442367   | <a href="#">Alberoni et al., 2021b</a><br>(NCBI bioproject <a href="#">PRJNA669646</a> ) |
| <b>VS2</b>                                                     | T0.C2                             | SAMN16442368   |                                                                                          |
| <b>VS3</b>                                                     | T0.C3                             | SAMN16442369   |                                                                                          |
| <b>VS4</b>                                                     | T0.C4                             | SAMN16442370   |                                                                                          |
| <b>VS5</b>                                                     | T0.C5                             | SAMN16442371   |                                                                                          |
| <b>VS6</b>                                                     | T0.P1                             | SAMN16442385   |                                                                                          |
| <b>VS7</b>                                                     | T0.P2                             | SAMN16442386   |                                                                                          |
| <b>VS8</b>                                                     | T0.P3                             | SAMN16442387   |                                                                                          |
| <b>VS9</b>                                                     | T0.P4                             | SAMN16442388   |                                                                                          |
| <b>VS10</b>                                                    | T0.P5                             | SAMN16442389   |                                                                                          |
| <b>SAN LAZZARO DI SAVENA (<i>APIS MELLIFERA LIGUSTICA</i>)</b> |                                   |                |                                                                                          |
| <b>SLS1</b>                                                    | T0.CA1                            | SAMN16442373   | <a href="#">Baffoni et al., 2021</a><br>(NCBI bioproject <a href="#">PRJNA669646</a> )   |
| <b>SLS2</b>                                                    | T0.CA2                            | SAMN16442374   |                                                                                          |
| <b>SLS3</b>                                                    | T0.CA3                            | SAMN16442375   |                                                                                          |
| <b>SLS4</b>                                                    | T0.TN1                            | SAMN16442409   |                                                                                          |
| <b>SLS5</b>                                                    | T0.TN2                            | SAMN16442410   |                                                                                          |
| <b>SLS6</b>                                                    | T0.TN3                            | SAMN16442411   |                                                                                          |
| <b>SLS7</b>                                                    | T4.CA1                            | SAMN16442428   |                                                                                          |
| <b>SLS8</b>                                                    | T4.CA2                            | SAMN16442429   |                                                                                          |
| <b>SLS9</b>                                                    | T4.CA3                            | SAMN16442430   |                                                                                          |
| <b>SLS10</b>                                                   | T4.CA4                            | SAMN16442431   |                                                                                          |

**Supplementary Table S2.** Retrieved *Apilactobacillus kunkeei* 16S rRNA gene sequences from the NCBI RefSeq database.

| <b>Strain</b>                                  | <b>Origin</b> | <b>RefSeq</b>                   |
|------------------------------------------------|---------------|---------------------------------|
| <i>Apilactobacillus kunkeei</i> Fhon2          | Sweden        | <a href="#">GCF_000830375.1</a> |
| <i>Apilactobacillus kunkeei</i> LAan           | Sweden        | <a href="#">GCF_019575995.1</a> |
| <i>Apilactobacillus kunkeei</i> LAce           | Sweden        | <a href="#">GCF_001421115.1</a> |
| <i>Apilactobacillus kunkeei</i> LAfl           | Sweden        | <a href="#">GCF_001421135.1</a> |
| <i>Apilactobacillus kunkeei</i> LAko           | Sweden        | <a href="#">GCF_001281205.1</a> |
| <i>Apilactobacillus kunkeei</i> LAla           | Sweden        | <a href="#">GCF_001281215.1</a> |
| <i>Apilactobacillus kunkeei</i> LAni           | Sweden        | <a href="#">GCF_001281285.1</a> |
| <i>Apilactobacillus kunkeei</i> YH-15          | Sweden        | <a href="#">GCF_001281265.1</a> |
| <i>Apilactobacillus kunkeei</i> LAdo           | Sweden        | <a href="#">GCF_001308205.1</a> |
| <i>Apilactobacillus kunkeei</i> LAnu           | Sweden        | <a href="#">GCF_001308215.1</a> |
| <i>Apilactobacillus kunkeei</i> LMbe           | Sweden        | <a href="#">GCF_001308185.1</a> |
| <i>Apilactobacillus kunkeei</i> LMbo           | Sweden        | <a href="#">GCF_001308195.1</a> |
| <i>Apilactobacillus kunkeei</i> MP2            | Cile          | <a href="#">GCF_001314945.1</a> |
| <i>Apilactobacillus kunkeei</i> FF30-6         | Japan         | <a href="#">GCF_001949975.2</a> |
| <i>Apilactobacillus kunkeei</i> UASWS1867-NN5  | Switzerland   | <a href="#">GCF_005930915.1</a> |
| <i>Apilactobacillus kunkeei</i> UASWS1869-NN19 | Switzerland   | <a href="#">GCF_005930925.1</a> |
| <i>Apilactobacillus kunkeei</i> UASWS1870-NN20 | Switzerland   | <a href="#">GCF_005930935.1</a> |
| <i>Apilactobacillus kunkeei</i> UASWS1868-NN17 | Switzerland   | <a href="#">GCF_005930975.1</a> |
| <i>Apilactobacillus kunkeei</i> KA_01          | USA           | <a href="#">GCF_006493415.1</a> |
| <i>Apilactobacillus kunkeei</i> 3L             | USA           | <a href="#">GCF_006493615.1</a> |
| <i>Apilactobacillus kunkeei</i> R13            | Germany       | <a href="#">GCF_023218665.1</a> |
| <i>Apilactobacillus kunkeei</i> R5             | Germany       | <a href="#">GCF_023218695.1</a> |
| <i>Apilactobacillus kunkeei</i> 26             | Germany       | <a href="#">GCF_023218705.1</a> |
| <i>Apilactobacillus kunkeei</i> 9              | Germany       | <a href="#">GCF_023218755.1</a> |
| <i>Apilactobacillus kunkeei</i> 10             | Germany       | <a href="#">GCF_023218775.1</a> |
| <i>Apilactobacillus kunkeei</i> 3              | Germany       | <a href="#">GCF_023218815.1</a> |

**Supplementary Table 3.** Relative abundance (%) per microbial taxa and sample.

|             | <i>Acinetobacter</i> | <i>Apilactobacillus</i> | <i>Arsenophonus</i> | <i>Bartonella</i> | <i>Bifidobacterium</i> | <i>Bombilactobacillus</i> | <i>Commensalibacter</i> | <i>Frischella</i> | <i>Gilliamella</i> | <i>Lactobacillus</i> | <i>Pseudomonas</i> | <i>Snodgrassella</i> |
|-------------|----------------------|-------------------------|---------------------|-------------------|------------------------|---------------------------|-------------------------|-------------------|--------------------|----------------------|--------------------|----------------------|
| <b>BZ1</b>  | 0.00                 | 0.11                    | 0.00                | 0.02              | 0.04                   | 0.12                      | 0.01                    | 0.12              | 0.15               | 0.36                 | 0.00               | 0.06                 |
| <b>BZ2</b>  | 0.00                 | 0.11                    | 0.00                | 0.01              | 0.05                   | 0.19                      | 0.01                    | 0.16              | 0.14               | 0.30                 | 0.00               | 0.03                 |
| <b>BZ3</b>  | 0.00                 | 0.09                    | 0.00                | 0.01              | 0.05                   | 0.23                      | 0.02                    | 0.05              | 0.18               | 0.30                 | 0.00               | 0.07                 |
| <b>BZ4</b>  | 0.00                 | 0.09                    | 0.00                | 0.02              | 0.07                   | 0.12                      | 0.02                    | 0.15              | 0.16               | 0.29                 | 0.00               | 0.09                 |
| <b>BZ5</b>  | 0.00                 | 0.06                    | 0.00                | 0.02              | 0.07                   | 0.11                      | 0.02                    | 0.23              | 0.18               | 0.22                 | 0.00               | 0.10                 |
| <b>BZ6</b>  | 0.00                 | 0.05                    | 0.00                | 0.03              | 0.06                   | 0.16                      | 0.01                    | 0.08              | 0.23               | 0.32                 | 0.00               | 0.06                 |
| <b>BZ7</b>  | 0.00                 | 0.09                    | 0.00                | 0.02              | 0.07                   | 0.21                      | 0.02                    | 0.04              | 0.11               | 0.39                 | 0.00               | 0.06                 |
| <b>BZ8</b>  | 0.00                 | 0.07                    | 0.00                | 0.01              | 0.03                   | 0.19                      | 0.00                    | 0.07              | 0.16               | 0.38                 | 0.00               | 0.11                 |
| <b>BZ9</b>  | 0.00                 | 0.08                    | 0.00                | 0.00              | 0.02                   | 0.20                      | 0.00                    | 0.04              | 0.18               | 0.42                 | 0.00               | 0.06                 |
| <b>BZ10</b> | 0.00                 | 0.06                    | 0.00                | 0.01              | 0.08                   | 0.30                      | 0.00                    | 0.07              | 0.17               | 0.22                 | 0.00               | 0.09                 |
| <b>CM1</b>  | 0.04                 | 0.02                    | 0.00                | 0.19              | 0.10                   | 0.10                      | 0.04                    | 0.00              | 0.14               | 0.14                 | 0.00               | 0.24                 |
| <b>CM2</b>  | 0.02                 | 0.04                    | 0.01                | 0.38              | 0.01                   | 0.00                      | 0.41                    | 0.08              | 0.05               | 0.01                 | 0.00               | 0.01                 |
| <b>CM3</b>  | 0.18                 | 0.01                    | 0.00                | 0.18              | 0.04                   | 0.03                      | 0.03                    | 0.26              | 0.16               | 0.04                 | 0.04               | 0.02                 |
| <b>CM4</b>  | 0.00                 | 0.00                    | 0.00                | 0.64              | 0.05                   | 0.01                      | 0.00                    | 0.01              | 0.08               | 0.02                 | 0.18               | 0.01                 |
| <b>CM5</b>  | 0.00                 | 0.01                    | 0.00                | 0.25              | 0.02                   | 0.00                      | 0.09                    | 0.14              | 0.17               | 0.04                 | 0.15               | 0.12                 |
| <b>CM6</b>  | 0.03                 | 0.12                    | 0.00                | 0.40              | 0.03                   | 0.00                      | 0.05                    | 0.06              | 0.16               | 0.04                 | 0.00               | 0.10                 |
| <b>CM7</b>  | 0.00                 | 0.08                    | 0.00                | 0.48              | 0.02                   | 0.01                      | 0.18                    | 0.12              | 0.08               | 0.02                 | 0.00               | 0.01                 |
| <b>CM8</b>  | 0.00                 | 0.03                    | 0.00                | 0.56              | 0.04                   | 0.00                      | 0.25                    | 0.00              | 0.07               | 0.03                 | 0.00               | 0.02                 |
| <b>CM9</b>  | 0.00                 | 0.01                    | 0.00                | 0.05              | 0.05                   | 0.00                      | 0.02                    | 0.05              | 0.26               | 0.20                 | 0.02               | 0.32                 |
| <b>CM10</b> | 0.00                 | 0.09                    | 0.00                | 0.31              | 0.15                   | 0.05                      | 0.12                    | 0.02              | 0.11               | 0.08                 | 0.00               | 0.06                 |
| <b>GH1</b>  | 0.00                 | 0.04                    | 0.00                | 0.36              | 0.13                   | 0.09                      | 0.02                    | 0.00              | 0.12               | 0.20                 | 0.00               | 0.04                 |
| <b>GH2</b>  | 0.00                 | 0.02                    | 0.01                | 0.49              | 0.05                   | 0.03                      | 0.01                    | 0.00              | 0.13               | 0.12                 | 0.02               | 0.12                 |
| <b>GH3</b>  | 0.00                 | 0.05                    | 0.00                | 0.44              | 0.07                   | 0.09                      | 0.02                    | 0.00              | 0.17               | 0.12                 | 0.00               | 0.03                 |
| <b>GH4</b>  | 0.01                 | 0.03                    | 0.03                | 0.76              | 0.04                   | 0.03                      | 0.01                    | 0.00              | 0.04               | 0.03                 | 0.00               | 0.02                 |
| <b>GH5</b>  | 0.00                 | 0.04                    | 0.00                | 0.44              | 0.07                   | 0.02                      | 0.07                    | 0.01              | 0.05               | 0.05                 | 0.16               | 0.09                 |
| <b>GH6</b>  | 0.00                 | 0.04                    | 0.00                | 0.70              | 0.05                   | 0.01                      | 0.06                    | 0.03              | 0.07               | 0.03                 | 0.00               | 0.00                 |
| <b>GH8</b>  | 0.00                 | 0.07                    | 0.00                | 0.72              | 0.02                   | 0.01                      | 0.05                    | 0.01              | 0.03               | 0.06                 | 0.00               | 0.02                 |
| <b>GH9</b>  | 0.00                 | 0.04                    | 0.00                | 0.27              | 0.03                   | 0.00                      | 0.15                    | 0.04              | 0.35               | 0.05                 | 0.05               | 0.02                 |
| <b>GH10</b> | 0.00                 | 0.03                    | 0.00                | 0.07              | 0.15                   | 0.04                      | 0.05                    | 0.03              | 0.12               | 0.22                 | 0.00               | 0.28                 |
| <b>SLS1</b> | 0.00                 | 0.07                    | 0.00                | 0.01              | 0.04                   | 0.13                      | 0.00                    | 0.08              | 0.10               | 0.52                 | 0.00               | 0.05                 |
| <b>SLS2</b> | 0.00                 | 0.03                    | 0.00                | 0.01              | 0.04                   | 0.20                      | 0.00                    | 0.01              | 0.10               | 0.54                 | 0.00               | 0.06                 |
| <b>SLS3</b> | 0.00                 | 0.09                    | 0.00                | 0.02              | 0.05                   | 0.10                      | 0.01                    | 0.05              | 0.23               | 0.36                 | 0.06               | 0.04                 |
| <b>SLS4</b> | 0.00                 | 0.09                    | 0.00                | 0.00              | 0.04                   | 0.20                      | 0.00                    | 0.05              | 0.07               | 0.50                 | 0.00               | 0.04                 |
| <b>SLS5</b> | 0.00                 | 0.11                    | 0.00                | 0.03              | 0.03                   | 0.16                      | 0.01                    | 0.07              | 0.12               | 0.38                 | 0.02               | 0.07                 |
| <b>SLS6</b> | 0.00                 | 0.06                    | 0.00                | 0.01              | 0.05                   | 0.18                      | 0.01                    | 0.02              | 0.11               | 0.50                 | 0.00               | 0.06                 |



|              |      |      |      |      |      |      |      |      |      |      |      |      |
|--------------|------|------|------|------|------|------|------|------|------|------|------|------|
| <b>SLS7</b>  | 0.00 | 0.09 | 0.00 | 0.00 | 0.03 | 0.13 | 0.00 | 0.06 | 0.09 | 0.56 | 0.00 | 0.03 |
| <b>SLS8</b>  | 0.00 | 0.06 | 0.00 | 0.00 | 0.04 | 0.18 | 0.00 | 0.04 | 0.09 | 0.56 | 0.00 | 0.03 |
| <b>SLS9</b>  | 0.00 | 0.09 | 0.00 | 0.01 | 0.04 | 0.22 | 0.00 | 0.05 | 0.18 | 0.37 | 0.00 | 0.04 |
| <b>SLS10</b> | 0.00 | 0.07 | 0.00 | 0.01 | 0.04 | 0.19 | 0.00 | 0.04 | 0.10 | 0.48 | 0.00 | 0.07 |
| <b>VS1</b>   | 0.00 | 0.04 | 0.00 | 0.04 | 0.04 | 0.12 | 0.01 | 0.02 | 0.17 | 0.51 | 0.02 | 0.03 |
| <b>VS2</b>   | 0.00 | 0.02 | 0.00 | 0.10 | 0.06 | 0.12 | 0.01 | 0.04 | 0.15 | 0.41 | 0.02 | 0.08 |
| <b>VS3</b>   | 0.00 | 0.02 | 0.00 | 0.36 | 0.03 | 0.07 | 0.00 | 0.05 | 0.17 | 0.28 | 0.01 | 0.01 |
| <b>VS4</b>   | 0.00 | 0.03 | 0.00 | 0.14 | 0.03 | 0.14 | 0.01 | 0.03 | 0.13 | 0.47 | 0.00 | 0.02 |
| <b>VS5</b>   | 0.00 | 0.09 | 0.00 | 0.01 | 0.03 | 0.20 | 0.00 | 0.03 | 0.17 | 0.45 | 0.00 | 0.01 |
| <b>VS6</b>   | 0.00 | 0.01 | 0.00 | 0.37 | 0.03 | 0.04 | 0.01 | 0.05 | 0.11 | 0.35 | 0.00 | 0.04 |
| <b>VS7</b>   | 0.00 | 0.03 | 0.00 | 0.00 | 0.02 | 0.29 | 0.00 | 0.04 | 0.13 | 0.42 | 0.00 | 0.06 |
| <b>VS8</b>   | 0.00 | 0.03 | 0.00 | 0.01 | 0.03 | 0.24 | 0.00 | 0.03 | 0.16 | 0.45 | 0.00 | 0.05 |
| <b>VS9</b>   | 0.00 | 0.02 | 0.00 | 0.05 | 0.04 | 0.18 | 0.00 | 0.05 | 0.15 | 0.41 | 0.05 | 0.04 |
| <b>VS10</b>  | 0.00 | 0.02 | 0.00 | 0.18 | 0.04 | 0.06 | 0.00 | 0.04 | 0.17 | 0.44 | 0.01 | 0.03 |
| <b>ZT1</b>   | 0.00 | 0.14 | 0.03 | 0.19 | 0.04 | 0.00 | 0.20 | 0.00 | 0.14 | 0.05 | 0.13 | 0.07 |
| <b>ZT2</b>   | 0.00 | 0.02 | 0.90 | 0.01 | 0.01 | 0.00 | 0.03 | 0.00 | 0.00 | 0.01 | 0.02 | 0.00 |
| <b>ZT3</b>   | 0.00 | 0.05 | 0.27 | 0.34 | 0.08 | 0.03 | 0.04 | 0.00 | 0.08 | 0.08 | 0.00 | 0.02 |
| <b>ZT4</b>   | 0.00 | 0.04 | 0.01 | 0.41 | 0.07 | 0.08 | 0.08 | 0.08 | 0.01 | 0.22 | 0.00 | 0.00 |
| <b>ZT5</b>   | 0.00 | 0.18 | 0.00 | 0.01 | 0.02 | 0.08 | 0.03 | 0.00 | 0.00 | 0.04 | 0.00 | 0.65 |
| <b>ZT6</b>   | 0.00 | 0.13 | 0.02 | 0.37 | 0.05 | 0.03 | 0.13 | 0.06 | 0.07 | 0.05 | 0.00 | 0.09 |
| <b>ZT7</b>   | 0.00 | 0.11 | 0.00 | 0.33 | 0.14 | 0.07 | 0.13 | 0.08 | 0.04 | 0.03 | 0.00 | 0.07 |
| <b>ZT8</b>   | 0.00 | 0.06 | 0.00 | 0.23 | 0.07 | 0.07 | 0.06 | 0.00 | 0.36 | 0.09 | 0.00 | 0.05 |
| <b>ZT9</b>   | 0.00 | 0.22 | 0.08 | 0.31 | 0.06 | 0.01 | 0.21 | 0.00 | 0.01 | 0.04 | 0.00 | 0.05 |
| <b>ZT10</b>  | 0.00 | 0.00 | 0.99 | 0.00 | 0.00 | 0.00 | 0.00 | 0.00 | 0.00 | 0.00 | 0.00 | 0.00 |

**Supplementary Table S4.** Microbial isolates (one per representative cluster in Fig.S15), identified with the sequencing of the 16S rRNA gene.

| Accession Number | Sequence ID/Strain | Identification                    |
|------------------|--------------------|-----------------------------------|
| MG601163         | MT53               | <i>Lactobacillus melliventris</i> |
| MG601164         | MT1                | <i>Gilliamella apicola</i>        |
| MG601165         | MT76               | <i>Lactobacillus apis</i>         |
| MG601166         | MT61               | <i>Lactobacillus apis</i>         |
| MG601167         | MT39               | <i>Apilactobacillus kunkeei</i>   |
| MG601168         | MT11               | <i>Klebsiella oxytoca</i>         |
| MG601169         | MT6                | <i>Gilliamella apicola</i>        |
| MG601170         | GH1                | <i>Apilactobacillus kunkeei</i>   |
| MG601171         | GH2                | <i>Apilactobacillus kunkeei</i>   |
| MG601172         | GH3                | <i>Apilactobacillus kunkeei</i>   |
| MT381710         | LGH12              | <i>Apilactobacillus kunkeei</i>   |
| MT381711         | LGH13              | <i>Apilactobacillus kunkeei</i>   |
| MT381712         | LGH15              | <i>Apilactobacillus kunkeei</i>   |
| MT381713         | LGH34              | <i>Apilactobacillus kunkeei</i>   |
| MT381714         | LGH35              | <i>Apilactobacillus kunkeei</i>   |
| MT381715         | LGH43              | <i>Apilactobacillus kunkeei</i>   |
| MT381716         | LGH49              | <i>Apilactobacillus kunkeei</i>   |
| MT381717         | LGH53              | <i>Apilactobacillus kunkeei</i>   |
| MT381718         | LGH55              | <i>Apilactobacillus kunkeei</i>   |
| MT381719         | LGH63              | <i>Apilactobacillus kunkeei</i>   |
| MT381720         | LGH70              | <i>Apilactobacillus kunkeei</i>   |
| MT381721         | LU2                | <i>Gilliamella apicola</i>        |
| MT381722         | LZ15               | <i>Apilactobacillus kunkeei</i>   |
| MT381723         | LZ25               | <i>Apilactobacillus kunkeei</i>   |
| MT381724         | LZ47               | <i>Apilactobacillus kunkeei</i>   |
| MT381725         | LZ43               | <i>Apilactobacillus kunkeei</i>   |
| MT381726         | LU5                | <i>Apilactobacillus kunkeei</i>   |
| MT381727         | LZ1                | <i>Apilactobacillus kunkeei</i>   |
| MT381728         | LZ4                | <i>Apilactobacillus kunkeei</i>   |
| MT381729         | LZ28               | <i>Apilactobacillus kunkeei</i>   |
| MT381730         | LZ48               | <i>Gilliamella apicola</i>        |
| MT381731         | LU6                | <i>Gilliamella apicola</i>        |
| MT381732         | LU12               | <i>Klebsiella oxytoca</i>         |
| MT381733         | LGH4               | <i>Apilactobacillus kunkeei</i>   |
| MT381734         | LGH5               | <i>Apilactobacillus kunkeei</i>   |
| MT381735         | LGH6               | <i>Apilactobacillus kunkeei</i>   |
| MT381736         | LZ32               | <i>Apilactobacillus kunkeei</i>   |
